# Supplementary material
Source: publisher figshare collection journal article supplement (https://gsapubs.figshare.com/articles/dataset/_/12531074)
Supplement: Supplementary file 1 [file 1]

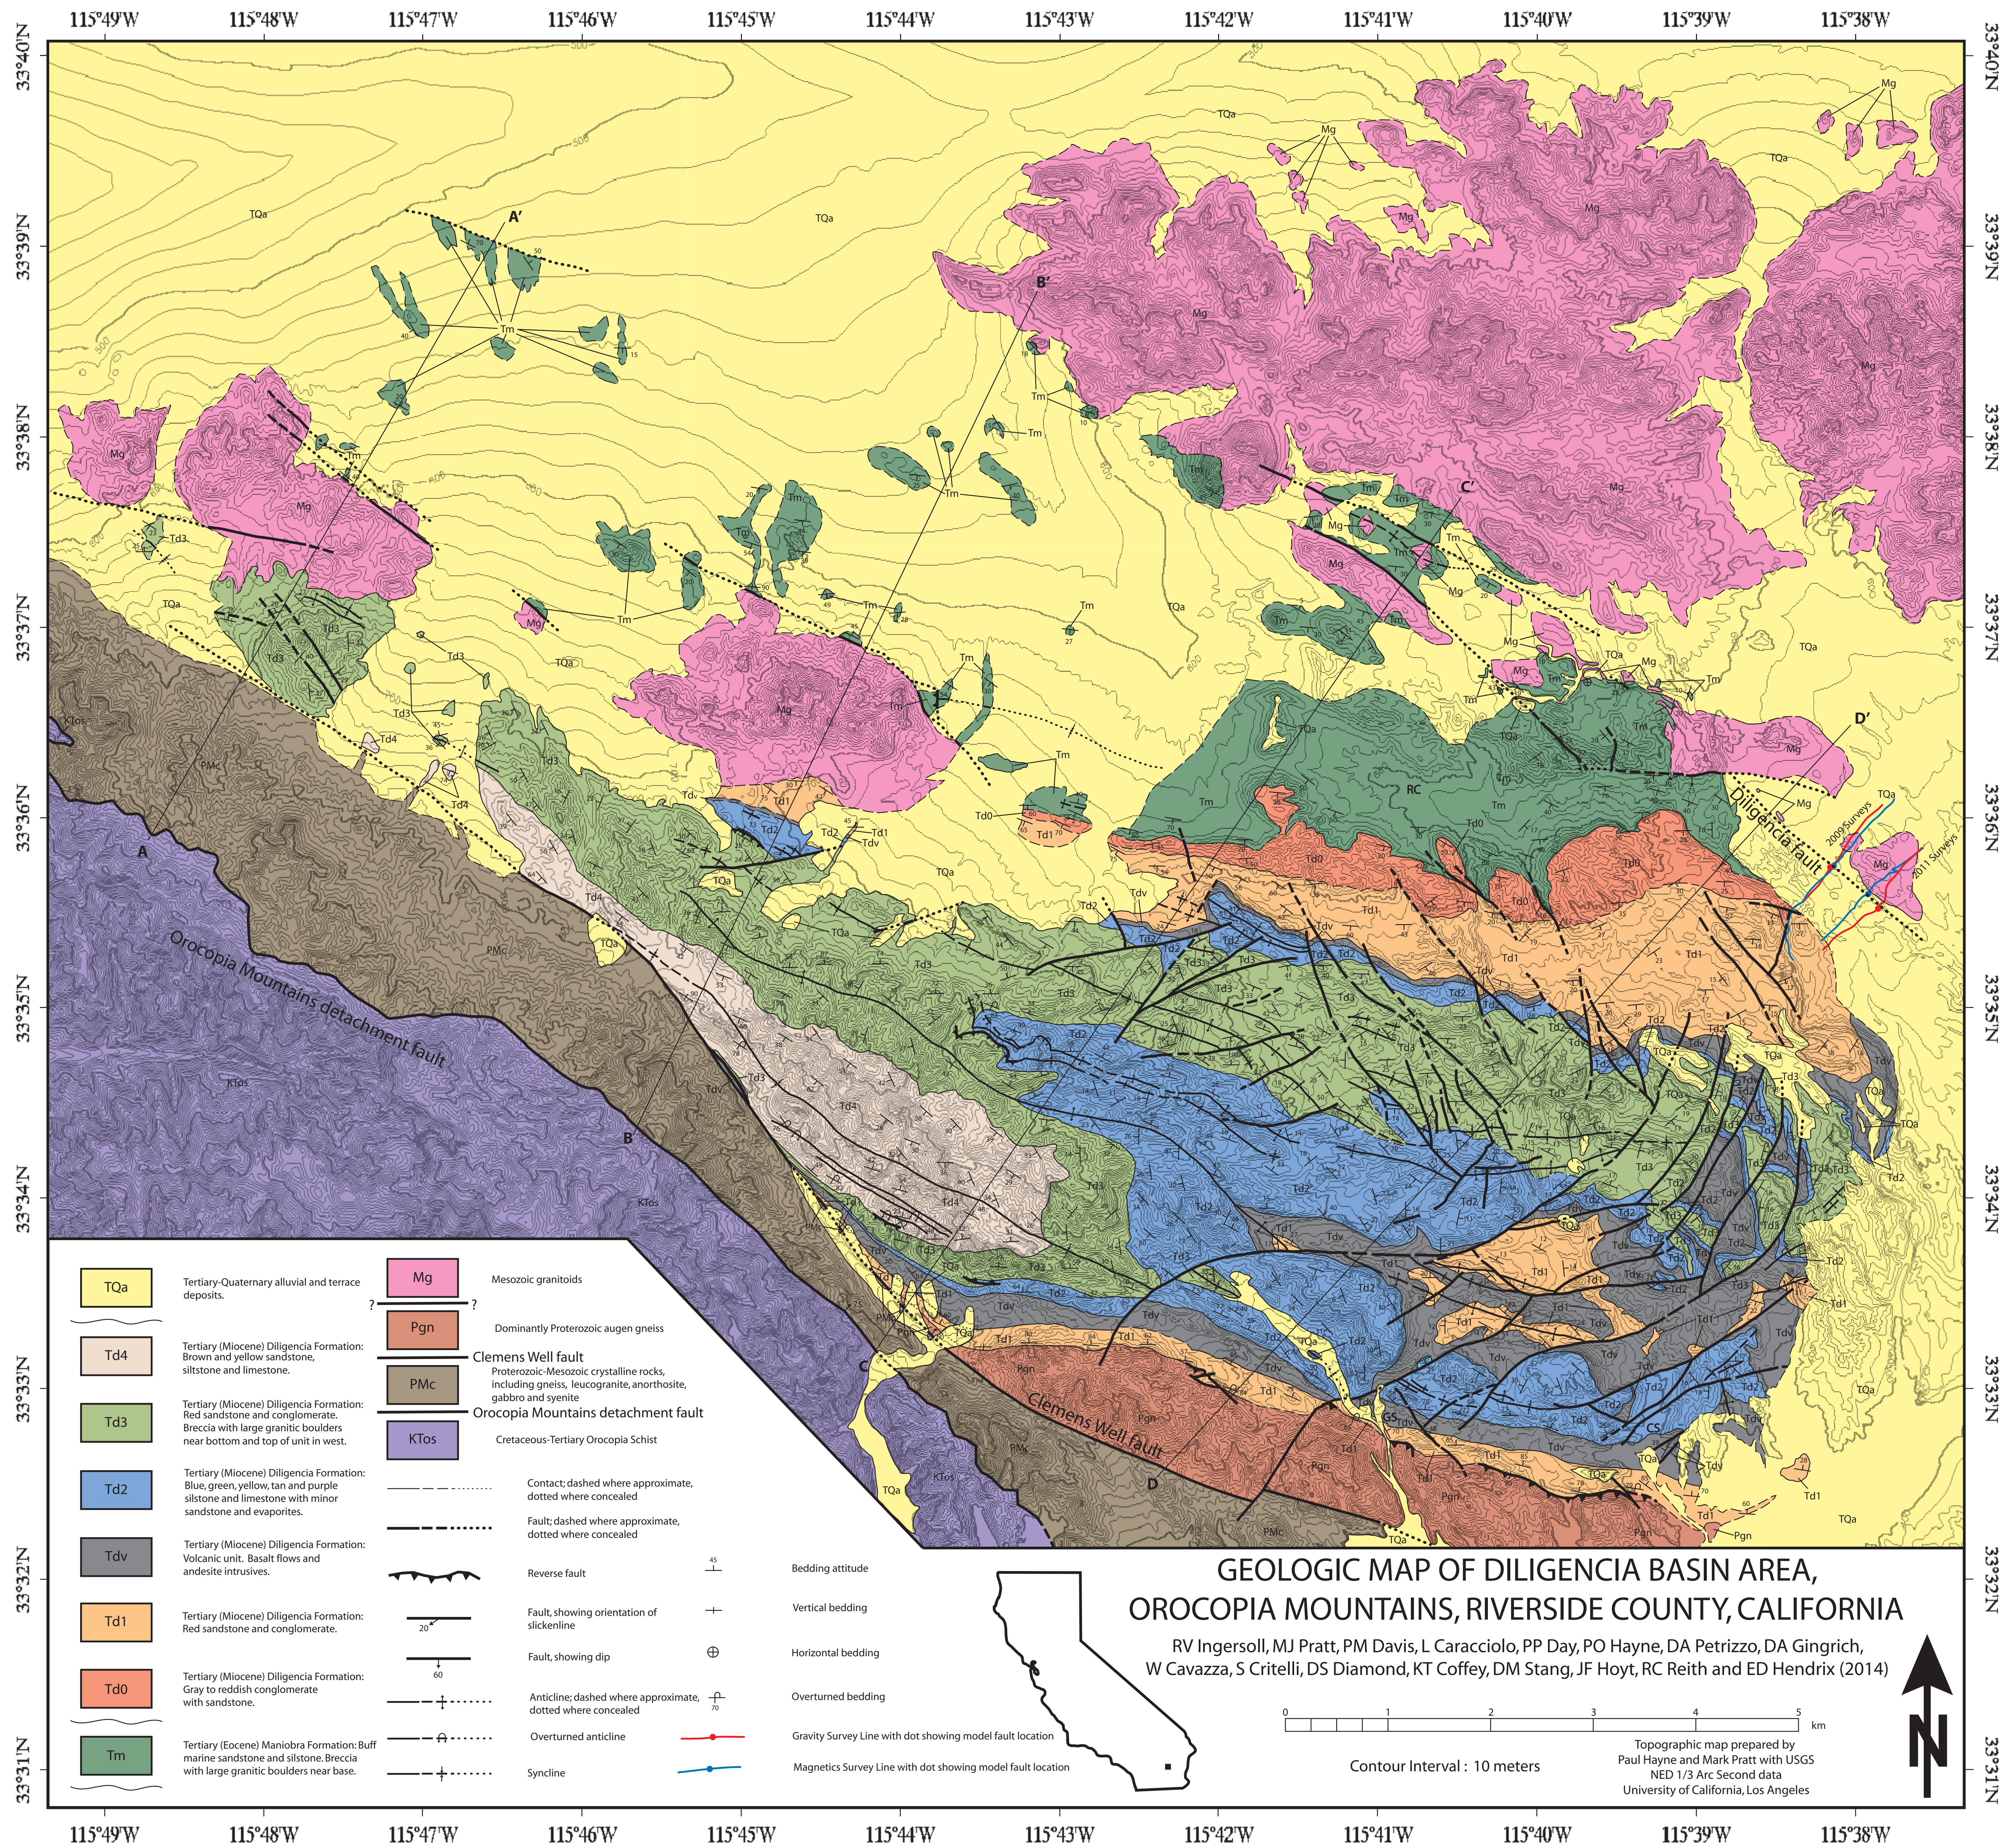

GSA Data Repository item #2014166

Ingersoll, R.V., et al., 2014, Paleotectonics of a complex Miocene half graben formed above a detachment fault: The Diligencia basin, Orocochia Mountains, southern California: Lithosphere, doi:10.1130/L334.1.
