# Supplementary material
Source: publisher figshare collection journal article supplement (https://gsapubs.figshare.com/articles/dataset/_/12531074)
Supplement: Supplementary file 2 [file 1]

Ingersoll, R.V., et al., 2014, Paleotectonics of a complex Miocene half graben formed above a detachment fault: The Diligencia basin, Orocopia Mountains, southern California: Lithosphere, doi:10.1130/L334.1.

## PREVIOUS WORK

The nearly simultaneous publication of evidence for large lateral displacement along faults of the San Andreas system by Crowell (1952), and Hill and Dibblee (1953) initiated a decades-long search for constraints on timing and magnitude of past fault displacements. Subsequent studies included matching similar terranes across faults (e.g., Crowell, 1960, 1962, 1975a; Matthews, 1976; Tennyson, 1989; Frizzell and Weigand, 1993; Matti and Morton, 1993; Powell, 1993), matching source terranes to sedimentary deposits across faults (e.g., Bohannon, 1975, 1976; Ehlig et al., 1975; Ehlert, 1982, 2003; Dillon and Ehlig, 1993; Matti and Morton, 1993; Sadler, 1993; Sadler et al., 1993; Weldon et al., 1993; Crowell, 2003), reconstruction of faunal provinces and paleogeography across faults (e.g., Hall, 1960, 2002; Stanley, 1987; Graham et al., 1989), reconstruction of volcanic centers across faults (e.g., Matthews, 1976; Cole and Basu, 1992, 1995; Frizzell and Weigand, 1993; Dickinson, 1997), constraining vertical-axis rotations across faults (e.g., Terres and Luyendyk, 1985; Hornafius et al., 1986; Carter et al., 1987; Luyendyk and Hornafius, 1987; Luyendyk, 1991; Dickinson, 1996) and constraining regional reconstructions through plate-tectonic marine records (e.g., Atwater, 1970, 1989; Legg, 1991; Legg et al., 1991; Lonsdale, 1991; Nicholson et al., 1994; Bohannon and Parsons, 1995; Atwater and Stock, 1998; Bohannon and Geist, 1998). Integration of these diverse data sets into well constrained paleogeographic and paleotectonic reconstructions has steadily advanced during the last 50 years (e.g., Hamilton, 1961; Yeats, 1968a, 1968b; Crowell, 1981, 1982, 1987; Weldon and Humphreys, 1986; Tennyson, 1989; Sedlock and Hamilton, 1991; Wright, 1991; Powell and Weldon, 1992; Crouch and Suppe, 1993; Richard, 1993; Nicholson et al., 1994; Bohannon and Parsons, 1995; Ingersoll and Rumelhart, 1999; Ingersoll, 2008a).

Miller (1944) produced the first map of the northern part of the Orocopia Mountains and named the Orocopia Schist, which he presumed to be Precambrian; he commented that the Orocopia Schist resembled the Pelona Schist of Hershey (1902). Hill and Dibblee (1953) speculated that the northeast end of the Pelona Schist of Sierra Pelona might be offset by the San Andreas fault from the west end of the Orocopia Schist in the Orocopia Mountains (Figs. 1 and 2). Dibblee (1954) suggested the presence of Eocene strata somewhere in the Orocopia Mountains, based on the occurrence of Eocene fossils in clasts of the Pliocene Mecca Formation. Williams (1956) and Gillies (1958) produced the first geologic maps, cross sections and stratigraphic sections of the Diligencia basin area, utilizing informal stratigraphic nomenclature. Kirkpatrick (1958) studied the Eocene paleontology, which Crowell and Susuki (1959) incorporated into their definition of the Eocene Maniobra Formation. Crowell (1960, 1962, 1975a) and Ehlig (1968, 1981) suggested specific correlations between the Orocopia and Soledad areas across the San Andreas fault, and the Tejon (Plush Ranch) area across the San Gabriel fault. Johnston (1961) provided additional micropaleontologic support for the Eocene age of the Maniobra Formation. Crowell and Walker (1962) described the anorthosite and related rocks in the Orocopia Mountains and suggested strong similarities with rocks in the San Gabriel Mountains. Woodburne and Whistler (1973) described an Early Miocene oreodont from the middle of the Diligencia Formation. Spittler and Arthur (1973) suggested that contrasts between the Orocopia and Soledad areas did not support direct correlations across the San Andreas fault. Arthur (1974) and Spittler (1974) (summarized by Spittler and Arthur, 1982) provided new data on volcanic petrology and geochemistry, sedimentology and stratigraphy of the Miocene strata.

Howell (1974, 1975) discussed the paleogeographic and paleotectonic significance of the Maniobra Formation. Bohannon (1975, 1976) suggested correlations of mid-Tertiary nonmarine

strata across strands of the San Andreas fault, including the Miocene Diligencia Formation (Crowell, 1975b) of the Orocopia Mountains; Tennyson (1989) modified Bohannon's (1975, 1976) paleogeographic reconstruction of these basins. Haxel and Dillon (1978) described and interpreted the Orocopia Schist and the Chocolate Mountain "thrust" system. Powell (1981, 1993) and Powell and Weldon (1992) described the crystalline rocks of the Orocopia Mountains and proposed possible palinspastic reconstructions. Spittler and Arthur (1982) and Squires and Advocate (1982) provided new sedimentologic, stratigraphic, petrologic and structural data and interpretations for the Diligencia basin.

Terres (1984) and Carter et al. (1987) determined the extent of clockwise vertical-axis rotations of the Diligencia basin and surrounding areas. Jacobson et al. (1988, 1996, 2000, 2002, 2007, 2011), Jacobson and Dawson (1995), and Grove et al. (2003) summarized the depositional, metamorphic, structural and tectonic evolution of the Orocopia and related schists. Advocate et al. (1988) interpreted the Maniobra Formation as a fault-controlled submarine-canyon deposit, which Grove (1993) correlated with submarine-fan deposits of Salinia (across the San Andreas fault). Crowell (1993) summarized the structure, stratigraphy, sedimentology and age of the Diligencia Formation, and noted that dextral NW-SE faults and sinistral NE-SW faults that cut the Diligencia Formation resulted from north-south compression that was younger than Middle Miocene and older than Quaternary. Frizzell and Weigand (1993) provided new radiometric ages for the Diligencia Formation. Dillon and Ehlig (1993), Matti and Morton (1993), Powell (1993) and Richard (1993) included the Orocopia Mountains in their palinspastic reconstructions of southeastern California.

Robinson and Frost (1996) suggested that faults along the northeast side of the Orocopia Schist antiform represent normal detachment faults, with down-to-the-northeast movement, which resulted in half-graben development of the Diligencia basin. Law et al. (2001) summarized the stratigraphy, sedimentology, petrology, structure and tectonic setting of the Diligencia basin area, and discussed a model for half-graben sedimentation (e.g., Leeder and Gawthorpe, 1987; Gawthorpe and Leeder, 2000) resulting from a theoretical fault bounding the north side of the basin. Vucic (2002) and Ebert (2004) provided additional thermochronologic, geochronologic and structural analyses for the Orocopia Mountains in order to test models for origin and evolution of the Orocopia Schist, detachment faults and the Diligencia basin. Yin (2002) proposed a passive-roof-thrust model for the emplacement of the Pelona-Orocopia Schist. Preliminary results from the present investigation were presented by Ingersoll (2009, 2010), and Caracciolo et al. (2013) discussed the diagenetic history of the Maniobra and Diligencia formations.

## REFERENCES CITED

- Advocate, D.M., Link, M.H., and Squires, R.L., 1988, Anatomy and history of an Eocene submarine canyon: the Maniobra Formation, southern California, *in* Filewicz, M.V., and Squires, R.L., eds., *Paleogene stratigraphy, west coast of North America* [Book 58]: Pacific Section, Society of Economic Paleontologists and Mineralogists, Los Angeles, p. 45–58.
- Arthur, M.A., 1974, Stratigraphy and sedimentation of Lower Miocene nonmarine strata of the Orocopia Mountains: constraints for late Tertiary slip on the San Andreas fault system in southern California [M.S. thesis]: University of California, Riverside, 200 p.
- Atwater, T., 1970, Implications of plate tectonics for the Cenozoic tectonic evolution of western North America: *Geological Society of America Bulletin*, v. 81, p. 3513–3536, doi:10.1130/0016-7606(1970)81[3513:IOPTFT]2.0.CO;2.

- Atwater, T., 1989, Plate tectonic history of the northeast Pacific and western North America, *in* Winterer, E.L., Hussong, D.M., and Decker, R.W., eds., *The eastern Pacific Ocean and Hawaii*: Boulder, Colorado, Geological Society of America, *Geology of North America*, v. N, p. 21–72.
- Atwater, T., and Stock, J., 1998, Pacific-North America plate tectonics of the Neogene southwestern United States: an update: *International Geology Review*, v. 40, p. 375–402, doi:10.1080/00206819809465216.
- Bohannon, R.G., 1975, Mid-Tertiary conglomerates and their bearing on Transverse Range tectonics, southern California, *in* Crowell, J.C., ed., *The San Andreas fault in southern California, a guide to the San Andreas fault from Mexico to the Carrizo Plain*: California Division of Mines and Geology Special Report 118, p. 75–82.
- Bohannon, R.G., 1976, Mid-Tertiary nonmarine rocks along the San Andreas fault in southern California [Ph.D. thesis]: University of California, Santa Barbara, 311 p.
- Bohannon, R.G., and Geist, E., 1998, Upper crustal structure and Neogene tectonic development of the California continental borderland: *Geological Society of America Bulletin*, v. 110, p. 779–800, doi:10.1130/0016-7606(1998)110<0779:UCSANT>2.3.CO;2.
- Bohannon, R.G., and Parsons, T., 1995, Tectonic implications of post-30 Ma Pacific and North American relative plate motions: *Geological Society of America Bulletin*, v. 107, p. 937–959, doi:10.1130/0016-7606(1995)107<0937:TIOPMP>2.3.CO;2.
- Caracciolo, L., Arribus, J., Ingersoll, R.V., and Critelli, S., 2013, The diagenetic destruction of porosity in plutoniclastic petrofacies: the Miocene Diligencia and Eocene Maniobra formations, Orocopia Mountains, southern California, USA: *Geological Society of London Special Publication* 386, doi:10.1144/SP386.9 (first published on 15 July 2013).
- Carter, J.N., Luyendyk, B.P., and Terres, R.R., 1987, Neogene clockwise tectonic rotation of the eastern Transverse Ranges, California, suggested by paleomagnetic vectors: *Geological Society of America Bulletin*, v. 98, p. 199–206, doi:10.1130/0016-7606(1987)98<199:NCTROT>2.0.CO;2.
- Cole, R.B., and Basu, A.R., 1992, Middle Tertiary volcanism during ridge-trench interactions in western California: *Science*, v. 258, p. 793–796, doi:10.1126/science.258.5083.793.
- Cole, R.B., and Basu, A.R., 1995, Nd-Sr isotopic geochemistry and tectonics of ridge subduction and middle Cenozoic volcanism in western California: *Geological Society of America Bulletin*, v. 107, p. 167–179, doi:10.1130/0016-7606(1995)107<0167:NSIGAT>2.3.CO;2.
- Crouch, J.K., and Suppe, J., 1993, Late Cenozoic tectonic evolution of the Los Angeles basin and inner California borderland: a model for core complex-like crustal extension: *Geological Society of America Bulletin*, v. 105, p. 1415–1434, doi:10.1130/0016-7606(1993)105<1415:LCTEOT>2.3.CO;2.
- Crowell, J.C., 1952, Probable large lateral displacement on San Gabriel fault, southern California: *Bulletin of the American Association of Petroleum Geologists*, v. 36, p. 2026–2035.
- Crowell, J.C., 1960, The San Andreas fault in southern California: *International Geological Congress Report of the Twenty-First Session Norden*, Part 18, p. 45–52.
- Crowell, J.C., 1962, Displacement along the San Andreas fault, California: *Geological Society of America Special Paper* 71, 61 p.
- Crowell, J.C., 1975a, The San Andreas fault in southern California: *California Division of Mines and Geology Special Report* 118, p. 7–27.

- Crowell, J.C., 1975b, Geologic sketch of the Orocopia Mountains, southeastern California: California Division of Mines and Geology Special Report 118, p. 99–110.
- Crowell, J.C., 1981, An outline of the tectonic history of southeastern California, *in* Ernst, W.G., ed., The geotectonic development of California [Rubey Volume I]: Prentice-Hall, Englewood Cliffs, p. 583–600.
- Crowell, J.C., 1982, The tectonics of Ridge basin, southern California, *in* Crowell, J.C., and Link, M.H., eds., Geologic history of Ridge basin southern California [Book 22]: Pacific Section, Society of Economic Paleontologists and Mineralogists, Los Angeles, p. 25–41.
- Crowell, J.C., 1987, Late Cenozoic basins of onshore southern California: complexity is the hallmark of their tectonic history, *in* Ingersoll, R.V., and Ernst, W.G., eds., Cenozoic basin development of coastal California [Rubey Volume VI]: Prentice-Hall, Englewood Cliffs, p. 207–241.
- Crowell, J.C., 1993, The Diligencia Formation, Orocopia Mountains, southeastern Calif: U.S. Geological Survey Bulletin, v. 2053, p. 239–242.
- Crowell, J.C., 2003, Tectonics of Ridge basin region, southern California, *in* Crowell, J.C., ed., Evolution of Ridge Basin, Southern California: an interplay of sedimentation and tectonics: Geological Society of America Special Paper 367, p. 157–203, doi:10.1130/0-8137-2367-1.157.
- Crowell, J.C., and Susuki, T., 1959, Eocene stratigraphy and paleontology, Orocopia Mountains, southeastern California: Geological Society of America Bulletin, v. 70, p. 581–592, doi:10.1130/0016-7606(1959)70[581:ESAPOM]2.0.CO;2.
- Crowell, J.C., and Walker, J.W.R., 1962, Anorthosite and related rocks along the San Andreas fault southern California: University of California Publications in Geological Sciences, v. 40, p. 219–288.
- Dibblee, T.W., Jr., 1954, Geology of the Imperial Valley region, California: California Division of Mines Bulletin 170, Chapter 2, p. 21–28, Plate 2.
- Dickinson, W.R., 1996, Kinematics of transrotational tectonism in the California Transverse Ranges and its contribution to cumulative slip along the San Andreas transform fault system: Geological Society of America Special Paper 305, 46 p., doi:10.1130/0-8137-2305-1.1.
- Dickinson, W.R., 1997, Tectonic implications of Cenozoic volcanism in coastal California: Geological Society of America Bulletin, v. 109, p. 936–954, doi:10.1130/0016-7606(1997)109<0936:OTIOCV>2.3.CO;2.
- Dillon, J.T., and Ehlig, P.L., 1993, Displacement on the southern San Andreas fault: Geological Society of America, v. 178, p. 199–216, doi:10.1130/MEM178-p199.
- Ebert, K.A., 2004, Exhumation history of the Orocopia Schist and development of hanging-wall structures of the Orocopia fault, southeastern California [M.S. thesis]: University of California, Los Angeles, 124p.
- Ehlert, K.W., 1982, Basin analysis of the Miocene Mint Canyon Formation, southern California, *in* Ingersoll, R.V., and Woodburne, M.O., eds., Cenozoic nonmarine deposits of California and Arizona: Pacific Section, Society of Economic Paleontologists and Mineralogists, Los Angeles, p. 51–64.
- Ehlert, K.W., 2003, Tectonic significance of the middle Miocene Mint Canyon and Caliente formations, southern California: Geological Society of America. Special Paper, v. 367, p. 113–130.

- Ehlig, P.L., 1968, Causes of distribution of Pelona, Rand, and Orocochia schists along the San Andreas and Garlock faults, *in* Dickinson, W.R., and Grantz, A., eds., Stanford University Publications Geological Sciences 11, p. 294–305.
- Ehlig, P.L., 1981, Origin and tectonic history of the basement terrane of the San Gabriel Mountains, central Transverse Ranges, *in* Ernst, W.G., ed., The geotectonic development of California [Rubey Volume I]: Prentice-Hall, Englewood Cliffs, p. 253–283.
- Ehlig, P.L., Ehlert, K.W., and Crowe, B.M., 1975, Offset of the Upper Miocene Caliente and Mint Canyon formations along the San Gabriel and San Andreas faults: California Division of Mines and Geology Special Report 118, p. 83–92.
- Frizzell, V.A., Jr., and Weigand, P.W., 1993, Whole-rock K-Ar ages and geochemical data from middle Cenozoic volcanic rocks, southern California: a test of correlations across the San Andreas fault: Geological Society of America, v. 178, p. 273–287, doi:10.1130/MEM178-p273.
- Gawthorpe, R.L., and Leeder, M.R., 2000, Tectono-sedimentary evolution of active extensional basins: Basin Research, v. 12, p. 195–218, doi:10.1046/j.1365-2117.2000.00121.x.
- Gillies, W.D., 1958, The geology of a portion of Cottonwood Springs quadrangle, Riverside County, California [M.S. thesis]: University of California, Los Angeles, 70p.
- Graham, S.A., Stanley, R.G., Bent, J.V., and Carter, J.B., 1989, Oligocene and Miocene paleogeography of central California and displacement along the San Andreas fault: Geological Society of America Bulletin, v. 101, p. 711–730, doi:10.1130/0016-7606(1989)101<0711:OAMPOC>2.3.CO;2.
- Grove, K., 1993, Latest Cretaceous basin formation within the Salinian terrane of west-central California: Geological Society of America Bulletin, v. 105, p. 447–463, doi:10.1130/0016-7606(1993)105<0447:LCBFWT>2.3.CO;2.
- Grove, M., Jacobson, C.E., Barth, A.P., and Vucic, A., 2003, Temporal and spatial trends of Late Cretaceous-early Tertiary underplating of Pelona and related schist beneath southern California and southwestern Arizona, *in* Johnson, S.E., Paterson, S.R., Fletcher, J.M., Girty, G.H., Kimbrough, D.L., and Martin-Barajas, A., eds., Tectonic evolution of northwestern Mexico and the southwestern U.S.A.: Geological Society of America Special Paper 374, p. 381–406.
- Hall, C.A., Jr., 1960, Displaced Miocene molluscan provinces along the San Andreas fault, California: University of California Publications in Geological Sciences, v. 34, p. 281–308.
- Hall, C.A., Jr., 2002, Nearshore marine paleoclimatic regions, increasing zoogeographic provinciality, molluscan extinctions, and paleoshorelines, California: Late Oligocene (27 Ma) to Late Pliocene (2.5 Ma): Geological Society of America Special Paper 357, 489p.
- Hamilton, W., 1961, origin of the Gulf of California: Geological Society of America Bulletin, v. 72, p. 1307–1318, doi:10.1130/0016-7606(1961)72[1307:OOTGOC]2.0.CO;2.
- Haxel, G.B., and Dillon, J.T., 1978, The Pelona-Orocochia Schist and Vincent-Chocolate Mountain thrust system, southern California, *in* Howell, D.G., and McDougall, K.A., eds., Mesozoic Paleogeography of the Western United States, Pacific Section, Society of Economic Paleontologists and Mineralogists, p. 453–469.
- Hershey, O.H., 1902, University of California Publications, Department of Geology Bulletin, v. 3, plate 1, map.
- Hill, M.L., and Dibblee, T.W., Jr., 1953, San Andreas, Garlock, and Big Pine faults, California: a study of the character, history, and tectonic significance of their displacements: Geological

- Society of America Bulletin, v. 64, p. 443–458, doi:10.1130/0016-7606(1953)64[443:SAGABP]2.0.CO;2.
- Hornafius, J.S., Luyendyk, B.P., Terres, R.R., and Kamerling, M.J., 1986, Timing and extent of Neogene tectonic rotation in the Western Transverse Ranges, California: Geological Society of America Bulletin, v. 97, p. 1476–1487, doi:10.1130/0016-7606(1986)97<1476:TAEONT>2.0.CO;2.
- Howell, D.G., 1974, Middle Eocene paleogeography of southern California [Ph.D. thesis]: University of California, Santa Barbara, 228 p.
- Howell, D.G., 1975, Early and Middle Eocene shoreline offset by the San Andreas fault, southern California: California Division of Mines and Geology Special Report 118, p. 69–74.
- Ingersoll, R.V., 2008a, Reconstructing southern California, *in* Spencer, J.E., and Titley, S.R., eds., Circum-Pacific tectonics, geologic evolution, and ore deposits: Arizona Geological Society Digest 22, p. 409–417.
- Ingersoll, R.V., 2009, Diligencia basin (southern California) revisited: sedimentation in half graben bounded on the northeast by normal fault: Geological Society of America Abstracts with Programs, v. 41, no. 7, p. 569.
- Ingersoll, R.V., 2010, Reconstructing the Diligencia and Vasquez basins across the San Andreas fault (southern California): Geological Society of America Abstracts with Programs, v. 42, no. 4, p. 43.
- Ingersoll, R.V., and Rumelhart, P.E., 1999, Three-stage evolution of the Los Angeles basin, southern California: *Geology*, v. 27, p. 593–596 (Correction, v. 27, p. 864).
- Jacobson, C.E., and Dawson, M.R., 1995, Structural and metamorphic evolution of the Orocochia Schist and related rocks, southern California: evidence for late movement on the Orocochia fault: *Tectonics*, v. 14, p. 933–944, doi:10.1029/95TC01446.
- Jacobson, C.E., Dawson, M.R., and Postlethwaite, C.E., 1988, Structure, metamorphism, and tectonic significance of the Pelona, Orocochia, and Rand Schists, southern California, *in* Ernst, W.G., ed., *Metamorphism and crustal evolution of the western United States [Rubey Volume VII]*: Prentice-Hall, Englewood Cliffs, p. 976–997.
- Jacobson, C.E., Oyarzabal, F.R., and Haxel, G.B., 1996, Subduction and exhumation of the Pelona-Orocochia-Rand schists, southern California: *Geology*, v. 24, p. 547–550, doi:10.1130/0091-7613(1996)024<0547:SAEOTP>2.3.CO;2.
- Jacobson, C.E., Barth, A.P., and Grove, M., 2000, Late Cretaceous protolith age and provenance of the Pelona and Orocochia Schists, southern California: implications for evolution of the Cordilleran margin: *Geology*, v. 28, p. 219–222, doi:10.1130/0091-7613(2000)28<219:LCPAAP>2.0.CO;2.
- Jacobson, C.E., Grove, M., Stamp, M.M., Vucic, A., Oyarzabal, F.R., Haxel, G.B., Tosdal, R.M., and Sherrod, D.R., 2002, Exhumation of the Orocochia Schist and related rocks in the Gavilan Hills area of southeasternmost California, *in* Barth, A., ed., *Contributions to Crustal Evolution of the Southwestern United States: Geological Society of America Special Paper 365*, p. 129–154, doi:10.1130/0-8137-2365-5.129.
- Jacobson, C.E., Grove, M., Vucic, A., Pedrick, J.N., and Ebert, K.A., 2007, Exhumation of the Orocochia Schist and associated rocks of southeastern California: Relative rates of erosion, synsubduction tectonic denudation, and middle Cenozoic extension, *in* Cloos, M., et al., eds., *Convergent Margin Terranes and Associated Regions: A Tribute to W.G. Ernst*: Geological Society of America Special Paper 419, p. 1–37.

- Jacobson, C.E., Grove, M., Pedrick, J.N., Barth, A.P., Marsaglia, K.M., Gehrels, G.E., and Nourse, J.A., 2011, Late Cretaceous-early Cenozoic tectonic evolution of the southern California margin inferred from provenance of trench and forearc sediments: *Geological Society of America Bulletin*, v. 123, p. 485–506, doi:10.1130/B30238.1.
- Johnston, I.M., 1961, Eocene foraminifera from the lower Maniobra Formation, Orocopia Mountains, Riverside County, California [M.A. thesis]: University of California, Berkeley, 93 p.
- Kirkpatrick, J.C., 1958, A study of some marine Middle Eocene formations in southern California [M.S. thesis]: University of California, Los Angeles, 75 p.
- Law, R.D., Eriksson, K., and Davisson, C., 2001, Formation, evolution, and inversion of the middle Tertiary Diligencia basin, Orocopia Mountains, southern California: *Geological Society of America Bulletin*, v. 113, p. 196–221, doi:10.1130/0016-7606(2001)113<0196:FEAIOT>2.0.CO;2.
- Leeder, M.R., and Gawthorpe, R.L., 1987, Sedimentary models for extensional tilt-block/half-graben basins in Coward, M.P., Dewey, J.F., and Hancock, P.L., eds., *Continental Extensional Tectonics*: Geological Society of London Special Publication 28, p. 139–152.
- Legg, M.R., 1991, Developments in understanding the tectonic evolution of the California Continental Borderland: *SEPM (Society for Sedimentary Geology) Special Publication* 46, p. 291–312.
- Legg, M.R., Wong-O., V., and Suarez-V., F., 1991, Geologic structure and tectonics of the Inner Continental Borderland of northern Baja California: *American Association of Petroleum Geologists Memoir* 47, p. 145–177.
- Lonsdale, P., 1991, Structural patterns of the Pacific floor offshore of Peninsular California: *American Association of Petroleum Geologists Memoir* 47, p. 87–125.
- Luyendyk, B.P., 1991, A model for Neogene crustal rotations, transtension, and transpression in southern California: *Geological Society of America Bulletin*, v. 103, p. 1528–1536, doi:10.1130/0016-7606(1991)103<1528:AMFNCR>2.3.CO;2.
- Luyendyk, B.P., and Hornafius, J.S., 1987, Neogene crustal rotations, fault slip, and basin development in southern California, in Ingersoll, R. V., and Ernst, W. G., eds., *Cenozoic basin development of coastal California (Rubey Volume VI)*: Englewood Cliffs, New Jersey, Prentice Hall, p. 259–283.
- Matthews, V.M., III, 1976, Correlation of Pinnacles and Neenach volcanic formations and their bearing on San Andreas fault problem: *The American Association of Petroleum Geologists Bulletin*, v. 60, p. 2128–2141.
- Matti, J.C., and Morton, D.M., 1993, Paleogeographic evolution of the San Andreas fault in southern California: a reconstruction based on a new cross-fault correlation, in Powell, R.E., et al., eds., *The San Andreas Fault System: Displacement, Palinspastic Reconstruction, and Geologic Evolution*: Geological Society of America Memoir 178, p. 107–159.
- Miller, W.J., 1944, Geology of Palm Springs-Blythe strip, Riverside County, California: *California Journal of Mines and Geology*, v. 40, p. 11–72.
- Nicholson, C., Sorlien, C.C., Atwater, T., Crowell, J.C., and Luyendyk, B.P., 1994, Microplate capture, rotation of the western Transverse Ranges, and initiation of the San Andreas transform as a low-angle fault system: *Geology*, v. 22, p. 491–495, doi:10.1130/0091-7613(1994)022<0491:MCROTW>2.3.CO;2.

- Powell, R.E., 1981, Geology of the crystalline basement complex, eastern Transverse Ranges, southern California: constraints on regional tectonic interpretations [Ph.D. thesis]: California Institute of Technology, Pasadena, 441 p.
- Powell, R.E., 1993, Balanced palinspastic reconstruction of pre-late Cenozoic paleogeology, southern California: geologic and kinematic constraints on evolution of the San Andreas fault system, *in* Powell, R.E., et al., eds., *The San Andreas Fault System: Displacement, Palinspastic Reconstruction, and Geologic Evolution*: Geological Society of America Memoir 178, p. 1–106, doi:10.1130/MEM178-p1.
- Powell, R.E., and Weldon, R.J., II, 1992, Evolution of the San Andreas fault: *Annual Review of Earth and Planetary Sciences*, v. 20, p. 431–468, doi:10.1146/annurev.earth.20.050192.002243.
- Richard, S.M., 1993, Palinspastic reconstruction of southeastern California and southwestern Arizona for the Middle Miocene: *Tectonics*, v. 12, p. 830–854, doi:10.1029/92TC02951.
- Robinson, K.L., and Frost, E.G., 1996, Orocochia Mountains detachment system: progressive development of a tilted crustal slab and half-graben sedimentary basin during regional extension, *in* Abbott, P.L., and Cooper, J.D., eds., *Field Conference Guide 1996: Pacific Section*, American Association of Petroleum Geologists, Bakersfield, p. 277–284.
- Sadler, P.M., 1993, The Santa Ana basin of the central San Bernardino Mountains: evidence of the timing of uplift and strike slip relative to the San Gabriel Mountains, *in* Powell, R.E., et al., eds., *The San Andreas Fault System: Displacement, Palinspastic Reconstruction, and Geologic Evolution*: Geological Society of America Memoir 178, p. 307–321.
- Sadler, P.M., Demirer, A., West, D., and Hillenbrand, J.M., 1993, The Mill Creek basin, the Potato Sandstone, and fault strands in the San Andreas fault zone south of the San Bernardino Mountains, *in* Powell, R.E., et al., eds., *The San Andreas Fault System: Displacement, Palinspastic Reconstruction, and Geologic Evolution*: Geological Society of America Memoir 178, p. 289–306.
- Sedlock, R.L., and Hamilton, D.H., 1991, Late Cenozoic tectonic evolution of southwestern California: *Journal of Geophysical Research*, v. 96, p. 2325–2351, doi:10.1029/90JB02018.
- Spittler, T.E., 1974, Volcanic petrology and stratigraphy of nonmarine strata, Orocochia Mountains: their bearing on Neogene slip on the San Andrea fault, southern California [M.S. thesis]: University of California, Riverside, 115 p.
- Spittler, T.E., and Arthur, M.A., 1973, Post Early Miocene displacement along the San Andreas fault in southern California, *in* Kovach, R.L., and Nur, A., eds., *Proceedings of the conference on tectonic problems of the San Andreas fault system*: Stanford University Publications, Geological Sciences, v. 13, p. 374–382.
- Spittler, T.E., and Arthur, M.A., 1982, The Lower Miocene Diligencia Formation of the Orocochia Mts., southern California: stratigraphy, petrology, sedimentology and structure, *in* Ingersoll, R.V., and Woodburne, M.O., eds., *Cenozoic nonmarine deposits of California and Arizona*: Pacific Section, Society of Economic Paleontologists and Mineralogists, Los Angeles, p. 83–99.
- Squires, R.L., and Advocate, D.M., 1982, Sedimentary facies of the nonmarine Lower Miocene Diligencia Formation, Canyon Spring area, Orocochia Mountains, southern California, *in* Ingersoll, R.V., and Woodburne, M.O., eds., *Cenozoic nonmarine deposits of California and Arizona*: Pacific Section, Society of Economic Paleontologists and Mineralogists, Los Angeles, p. 101–106.



- Stanley, R.G., 1987, New estimates of displacement along the San Andreas fault in central California based on paleobathymetry and paleogeography: *Geology*, v. 15, p. 171–174, doi:10.1130/0091-7613(1987)15<171:NEODAT>2.0.CO;2.
- Tennyson, M.E., 1989, Pre-transform early Miocene extension in western California: *Geology*, v. 17, p. 792–796, doi:10.1130/0091-7613(1989)017<0792:PTEMEI>2.3.CO;2.
- Terres, R.R., 1984, Paleomagnetism and tectonics of the central and eastern Transverse Ranges, southern California [Ph.D. thesis]: University of California, Santa Barbara, 325 p.
- Terres, R.R., and Luyendyk, B.P., 1985, Neogene tectonic rotation of the San Gabriel region, California, suggested by paleomagnetic vectors: *Journal of Geophysical Research*, v. 90, p. 12,467–12,484, doi:10.1029/JB090iB14p12467.
- Vucic, A., 2002, Multi-stage exhumation history of the Orocopia Schist in the Orocopia Mountains of southeast California [M.S. thesis]: Iowa State University, Ames, 102 p.
- Weldon, R., and Humphreys, E., 1986, A kinematic model of southern California: *Tectonics*, v. 5, p. 33–48, doi:10.1029/TC005i001p00033.
- Weldon, R.J., II, Meisling, K.E., and Alexander, J., 1993, A speculative history of the San Andreas fault in the central Transverse Ranges, California *in* Powell, R.E., et al., eds., *The San Andreas Fault System: Displacement, Palinspastic Reconstruction, and Geologic Evolution*: Geological Society of America Memoir 178, p. 161–198.
- Williams, J.J., 1956, Geology of part of the Orocopia Mountains, Riverside County, California [M.A. thesis]: University of California, Los Angeles, 43 p.
- Woodburne, M.O., and Whistler, D.P., 1973, An Early Miocene oreodont (Merychyinae, Mammalia) from the Orocopia Mountains, southern California: *Journal of Paleontology*, v. 47, p. 908–912.
- Wright, T.L., 1991, Structural geology and tectonic evolution of the Los Angeles basin, California: *American Association of Petroleum Geologists Memoir* 52, p. 35–134.
- Yeats, R.S., 1968a, Rifting and rafting in the southern California borderland, *in* Dickinson, W.R., and Grantz, A., eds., *Proceedings of conference on geologic problems of San Andreas fault system*: Stanford University Publications, Geological Sciences, v. 11, p. 307–320.
- Yeats, R.S., 1968b, Southern California structure, sea-floor spreading, and history of the Pacific Basin: *Geological Society of America Bulletin*, v. 79, p. 1693–1702, doi:10.1130/0016-7606(1968)79[1693:SCSSSA]2.0.CO;2.
- Yin, A., 2002, Passive-roof thrust model for the emplacement of the Pelona-Orocopia Schist in southern California, United States: *Geology*, v. 30, p. 183–186, doi:10.1130/0091-7613(2002)030<0183:PRTMFT>2.0.CO;2.

TABLE 1. DILIGENCIA FORMATION CONGLOMERATE CLAST SIZE  
(MEAN DIAMETER OF 10 COARSEST CLASTS (CM))

| SAMPLE   |     |     |     |     |     |     |     |     |     |     | MEAN  |
|----------|-----|-----|-----|-----|-----|-----|-----|-----|-----|-----|-------|
| DL-1     | 135 | 70  | 80  | 80  | 65  | 70  | 85  | 70  | 85  | 110 | 85    |
| DL-2     | 270 | 160 | 165 | 130 | 180 | 150 | 125 | 140 | 120 | 120 | 156   |
| DL-3     | 110 | 110 | 130 | 120 | 115 | 105 | 100 | 150 | 140 | 150 | 123   |
| DL-4     | 160 | 110 | 90  | 110 | 195 | 95  | 105 | 100 | 150 | 100 | 121.5 |
| DL-5     | 90  | 75  | 80  | 110 | 80  | 90  | 80  | 90  | 70  | 105 | 87    |
| DL-6     | 80  | 65  | 50  | 55  | 70  | 45  | 70  | 45  | 55  | 45  | 58    |
| DL-7     | 75  | 95  | 65  | 55  | 60  | 80  | 90  | 95  | 80  | 60  | 75.5  |
| DL-8     | 80  | 80  | 65  | 70  | 60  | 60  | 60  | 75  | 65  | 90  | 70.5  |
| DL-9     | 85  | 60  | 70  | 100 | 60  | 65  | 70  | 60  | 80  | 55  | 70.5  |
| DL-10    | 65  | 45  | 50  | 50  | 55  | 75  | 40  | 40  | 70  | 45  | 53.5  |
| DL-11    | 60  | 80  | 65  | 85  | 55  | 60  | 60  | 65  | 65  | 60  | 65.5  |
| DL-17    | 50  | 60  | 80  | 65  | 55  | 60  | 55  | 50  | 60  | 45  | 58    |
| DL-18    | 65  | 50  | 55  | 90  | 50  | 55  | 65  | 55  | 50  | 60  | 59.5  |
| DL-19    | 100 | 130 | 70  | 110 | 75  | 80  | 90  | 70  | 75  | 80  | 88    |
| DL-20    | 140 | 135 | 120 | 125 | 115 | 145 | 215 | 175 | 133 | 113 | 141.6 |
| DL-21    | 110 | 102 | 105 | 150 | 132 | 140 | 170 | 205 | 145 | 150 | 140.9 |
| DL-22    | 135 | 95  | 110 | 110 | 85  | 105 | 120 | 88  | 110 | 75  | 103.3 |
| DL-23    | 170 | 125 | 105 | 106 | 120 | 130 | 135 | 100 | 110 | 85  | 118.6 |
| DL-24    | 95  | 165 | 130 | 93  | 135 | 105 | 160 | 97  | 200 | 140 | 132   |
| DL-25    | 88  | 130 | 100 | 120 | 90  | 170 | 86  | 110 | 100 | 160 | 115.4 |
| DL-26    | 75  | 80  | 90  | 120 | 100 | 95  | 150 | 100 | 90  | 130 | 103   |
| DL-27    | 75  | 80  | 80  | 115 | 75  | 95  | 110 | 90  | 70  | 105 | 89.5  |
| DL-28A   | 110 | 130 | 90  | 205 | 85  | 85  | 95  | 100 | 85  | 150 | 113.5 |
| DL-28B   | 135 | 150 | 165 | 120 | 125 | 115 | 115 | 205 | 175 | 175 | 148   |
| DL-29    | 170 | 115 | 135 | 115 | 125 | 155 | 190 | 140 | 120 | 125 | 139   |
| DL-30    | 170 | 175 | 130 | 205 | 190 | 145 | 180 | 135 | 145 | 160 | 163.5 |
| DL-31    | 125 | 110 | 105 | 115 | 100 | 95  | 90  | 95  | 105 | 100 | 104   |
| DL-32    | 115 | 105 | 85  | 90  | 145 | 110 | 95  | 160 | 120 | 105 | 113   |
| DL-33    | 85  | 75  | 115 | 120 | 85  | 95  | 110 | 90  | 95  | 85  | 95.5  |
| DL-34    | 65  | 75  | 90  | 60  | 75  | 70  | 60  | 65  | 85  | 90  | 73.5  |
| DL-35    | 75  | 83  | 105 | 122 | 85  | 110 | 130 | 120 | 82  | 75  | 98.7  |
| DL-36    | 58  | 84  | 59  | 77  | 72  | 108 | 66  | 63  | 59  | 59  | 70.5  |
| DL-37    | 76  | 49  | 53  | 55  | 51  | 64  | 57  | 55  | 64  | 70  | 59.4  |
| PDL-3    | 150 | 80  | 100 | 110 | 90  | 80  | 120 | 100 | 150 | 120 | 110   |
| PDL-4    | 180 | 140 | 150 | 180 | 150 | 140 | 150 | 180 | 140 | 200 | 161   |
| PDL-6    | 150 | 200 | 150 | 140 | 130 | 140 | 140 | 140 | 190 | 140 | 152   |
| PDL-8    | 150 | 130 | 120 | 130 | 150 | 140 | 140 | 130 | 120 | 150 | 136   |
| TD-M9    | 85  | 90  | 75  | 85  | 80  | 120 | 95  | 125 | 70  | 110 | 93.5  |
| TD-M10   | 80  | 110 | 100 | 70  | 60  | 60  | 80  | 85  | 65  | 65  | 77.5  |
| TD-M11   | 85  | 95  | 115 | 130 | 90  | 140 | 100 | 80  | 75  | 85  | 99.5  |
| TD-M12   | 110 | 85  | 95  | 70  | 65  | 60  | 62  | 65  | 60  | 55  | 72.7  |
| TD-M13   | 85  | 85  | 80  | 70  | 65  | 55  | 55  | 55  | 65  | 60  | 67.5  |
| TDRB-1-2 | 27  | 28  | 25  | 58  | 30  | 35  | 22  | 33  | 35  | 22  | 31.5  |
| TDRB-5   | 35  | 57  | 30  | 33  | 90  | 30  | 24  | 30  | 27  | 26  | 38.2  |

TABLE 2. PALEOCURRENT MEASUREMENTS  
(VECTOR MEANS OF 10 ORIENTATION MEASUREMENTS  
OF THE MAXIMUM CROSS-SECTIONAL AREAS  
OF IMBRICATED CONGLOMERATE CLASTS)

| Samples     | Vector Mean Direction<br>(Azimuth) |
|-------------|------------------------------------|
| DL-1        | 137°                               |
| DL-3        | 171°                               |
| DL-4        | 135°                               |
| DL-5        | 144°                               |
| DL-7        | 158°                               |
| DL-8        | 139°                               |
| DL-9        | 114°                               |
| DL-10       | 080°                               |
| DL-11       | 120°                               |
| DL-36-37(1) | 153°                               |
| DL-36-37(2) | 170°                               |
| DL-36-37(3) | 244°                               |
| DL-36-37(4) | 254°                               |
| TD-M10      | 198°                               |
| TD-M11      | 144°                               |
| TD-M12      | 180°                               |
| TD-M13      | 190°                               |
| TDRB-2      | 096°                               |
| TDRB -5     | 144°                               |
| PDL-3       | 250°                               |
| PDL-5       | 273°                               |
| PDL-8       | 255°                               |

TABLE 3. DILIGENCIA FORMATION CONGLOMERATE CLAST COMPOSITIONS  
(100 COUNTS/SAMPLE)

| SAMPLE   | Granite | Gneiss | Amphibolite<br>Metavolcanic | Other<br>Plutonic | Other | TOTAL |
|----------|---------|--------|-----------------------------|-------------------|-------|-------|
| DL-1     | 63      | 23     | 8                           | 6                 | 0     | 100   |
| DL-2     | 81      | 14     | 2                           | 1                 | 2     | 100   |
| DL-3     | 72      | 19     | 6                           | 3                 | 0     | 100   |
| DL-4     | 76      | 13     | 6                           | 4                 | 1     | 100   |
| DL-5     | 69      | 20     | 8                           | 3                 | 0     | 100   |
| DL-6     | 85      | 11     | 4                           | 0                 | 0     | 100   |
| DL-7     | 80      | 16     | 4                           | 0                 | 0     | 100   |
| DL-8     | 75      | 18     | 6                           | 0                 | 1     | 100   |
| DL-9     | 73      | 25     | 2                           | 0                 | 0     | 100   |
| DL-10    | 85      | 10     | 5                           | 0                 | 0     | 100   |
| DL-11    | 73      | 22     | 5                           | 0                 | 0     | 100   |
| DL-17    | 77      | 18     | 3                           | 2                 | 0     | 100   |
| DL-18    | 77      | 20     | 3                           | 0                 | 0     | 100   |
| DL-19    | 80      | 18     | 2                           | 0                 | 0     | 100   |
| DL-20    | 77      | 18     | 3                           | 2                 | 0     | 100   |
| DL-21    | 76      | 19     | 5                           | 0                 | 0     | 100   |
| DL-22    | 90      | 7      | 3                           | 0                 | 0     | 100   |
| DL-23    | 89      | 8      | 3                           | 0                 | 0     | 100   |
| DL-24    | 73      | 21     | 3                           | 3                 | 0     | 100   |
| DL-25    | 83      | 16     | 1                           | 0                 | 0     | 100   |
| DL-26    | 84      | 14     | 1                           | 1                 | 0     | 100   |
| DL-27    | 79      | 19     | 2                           | 0                 | 0     | 100   |
| DL-28A   | 78      | 16     | 5                           | 0                 | 1     | 100   |
| DL-28B   | 76      | 22     | 2                           | 0                 | 0     | 100   |
| DL-29    | 56      | 42     | 2                           | 0                 | 0     | 100   |
| DL-30    | 70      | 28     | 2                           | 0                 | 0     | 100   |
| DL-31    | 38      | 60     | 2                           | 0                 | 0     | 100   |
| DL-32    | 34      | 65     | 1                           | 0                 | 0     | 100   |
| DL-33    | 48      | 48     | 2                           | 0                 | 2     | 100   |
| DL-34    | 38      | 60     | 1                           | 0                 | 1     | 100   |
| DL-35    | 46      | 52     | 2                           | 0                 | 0     | 100   |
| DL-36    | 22      | 77     | 1                           | 0                 | 0     | 100   |
| DL-37    | 21      | 73     | 1                           | 0                 | 5     | 100   |
| PDL-3    | 86      | 4      | 1                           | 8                 | 1     | 100   |
| PDL-4    | 70      | 21     | 0                           | 4                 | 5     | 100   |
| PDL-6    | 47      | 12     | 0                           | 41                | 0     | 100   |
| PDL-8    | 68      | 23     | 9                           | 0                 | 0     | 100   |
| TD-M9    | 73      | 22     | 5                           | 0                 | 0     | 100   |
| TD-M10   | 75      | 20     | 4                           | 1                 | 0     | 100   |
| TD-M11   | 73      | 20     | 4                           | 2                 | 1     | 100   |
| TD-M12   | 71      | 24     | 3                           | 2                 | 0     | 100   |
| TD-M13   | 73      | 21     | 2                           | 4                 | 0     | 100   |
| TDRB-1-2 | 68      | 27     | 5                           | 0                 | 0     | 100   |
| TDRB-5   | 68      | 28     | 4                           | 0                 | 0     | 100   |



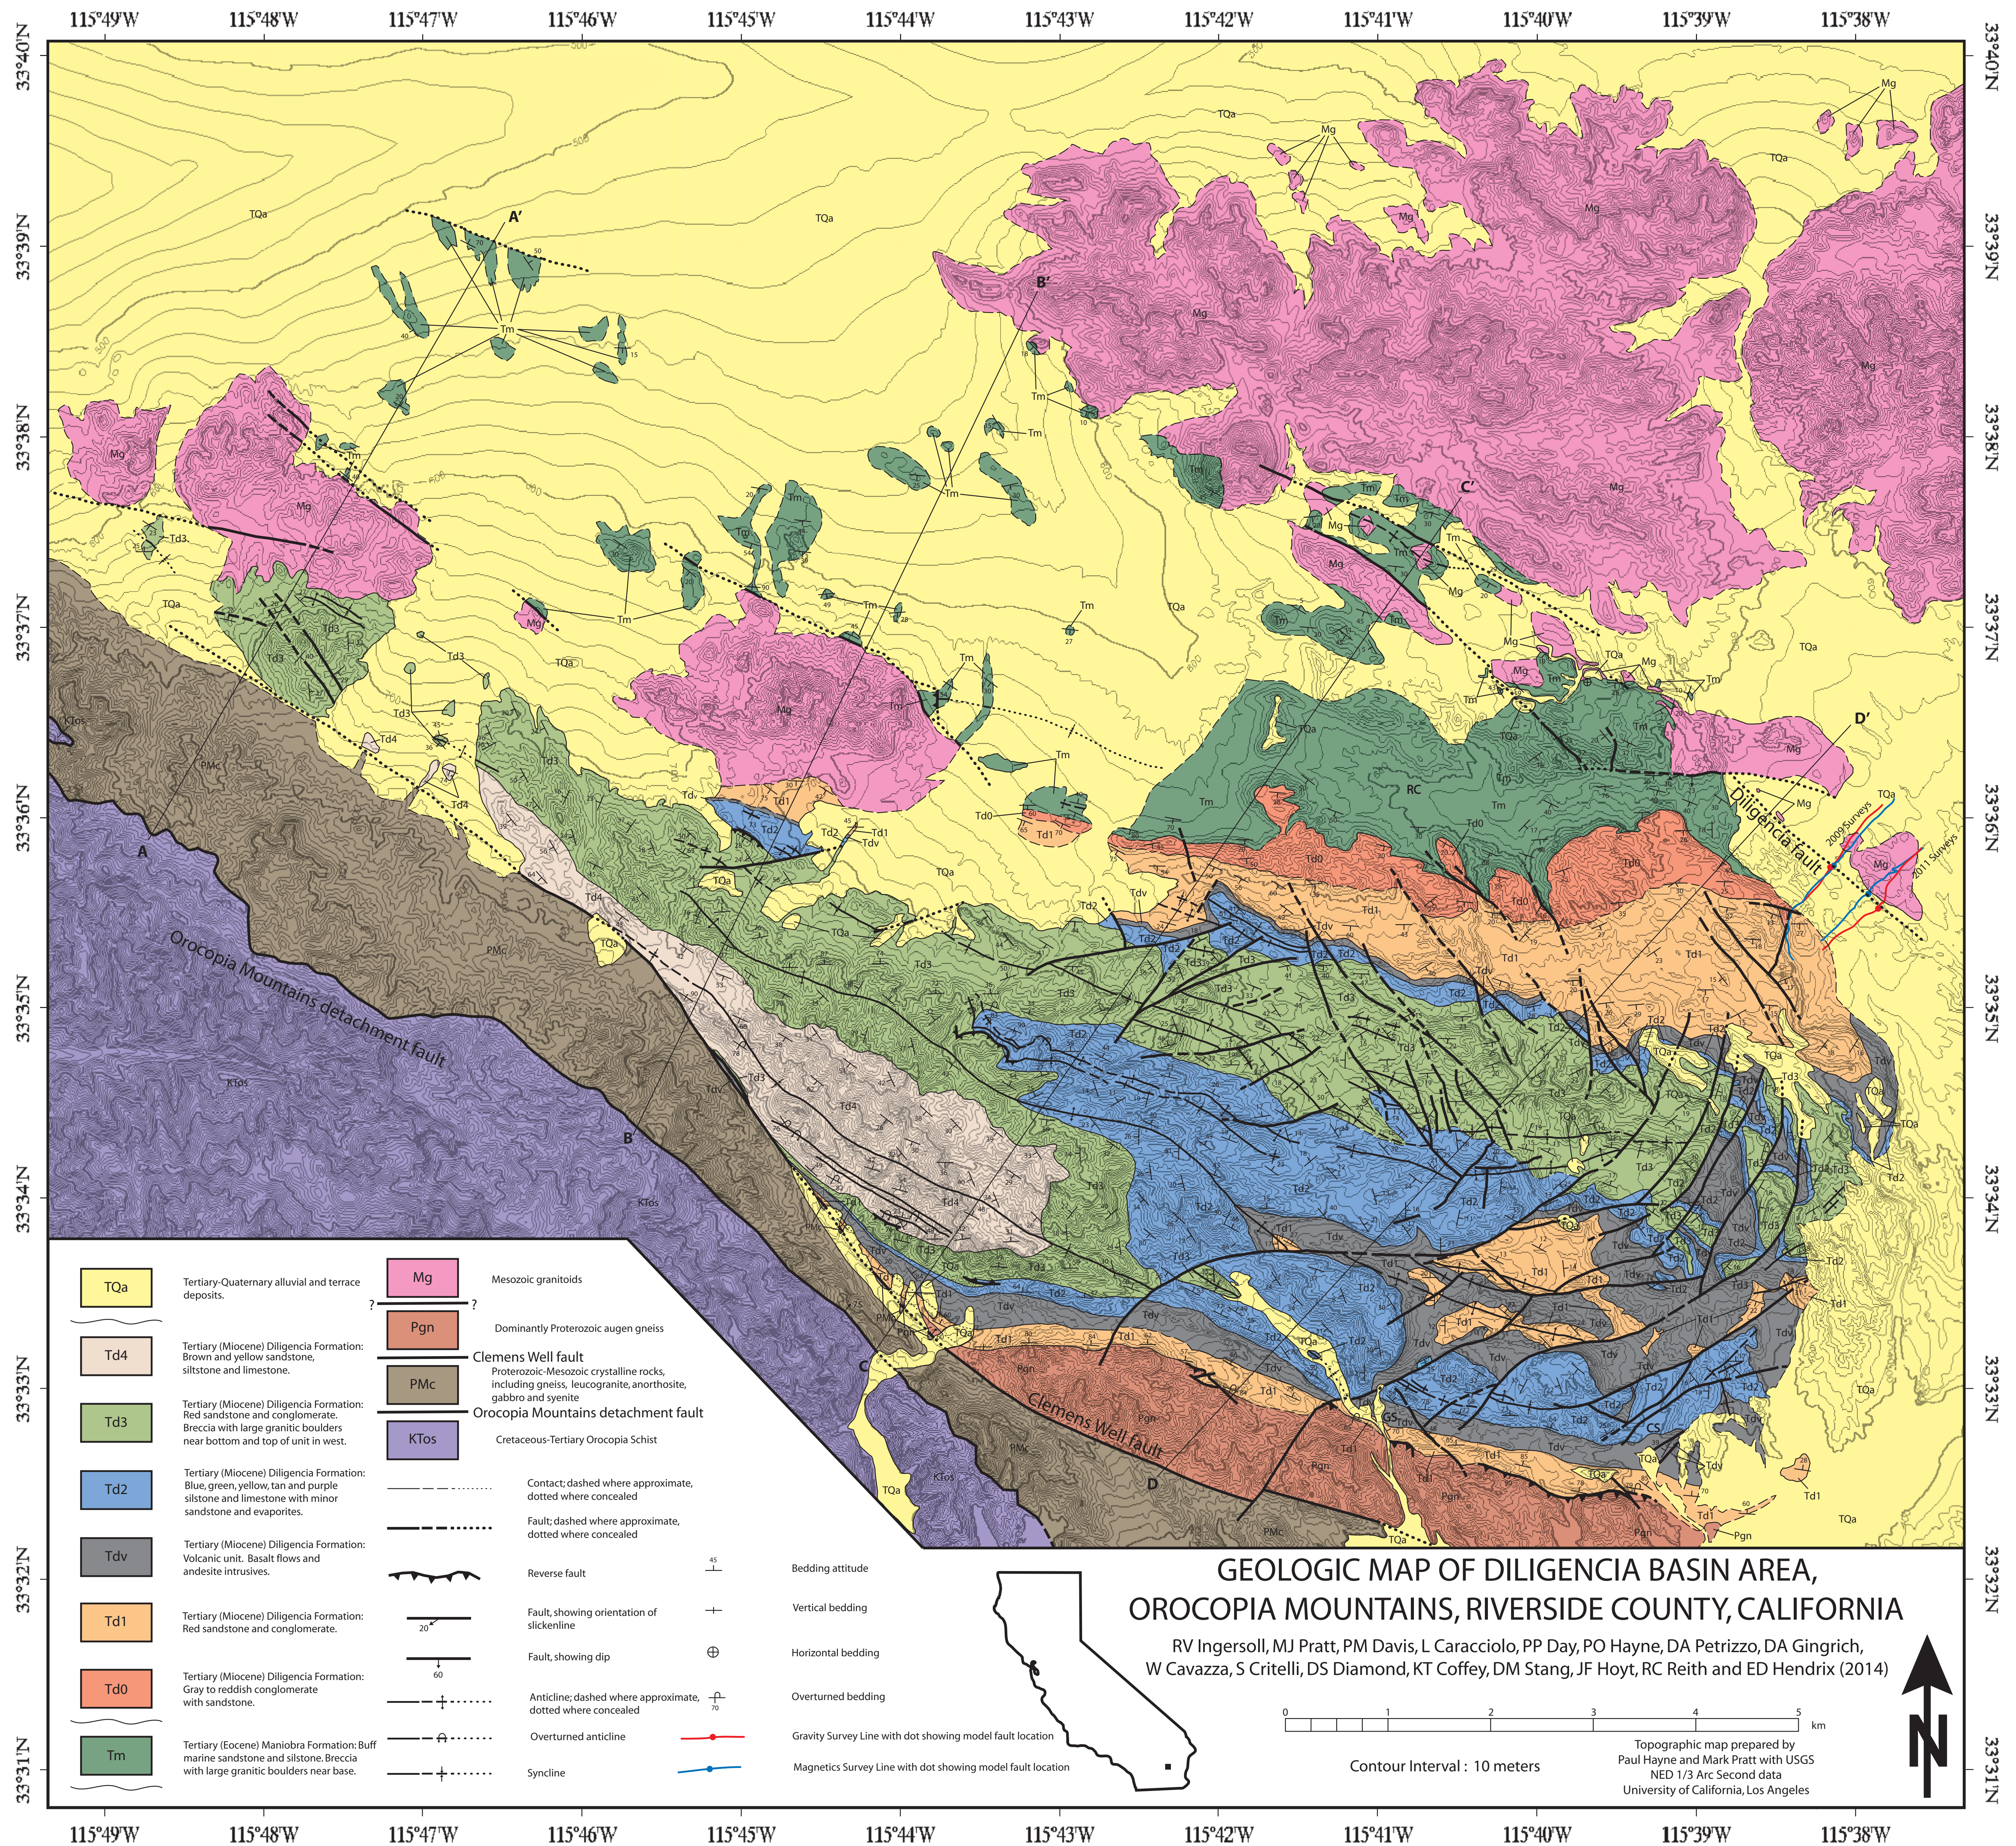

GSA Data Repository item #2014166

Ingersoll, R.V., et al., 2014, Paleotectonics of a complex Miocene half graben formed above a detachment fault: The Diligencia basin, Orocochia Mountains, southern California: Lithosphere, doi:10.1130/L334.1.
